# Supplementary material for: A novel stress-inducible CmtR-ESX3-Zn2+ regulatory pathway essential for survival of Mycobacterium bovis under oxidative stress
Source: PubMed Central journal article supplement (PMC7863910; doi:10.1074/jbc.ra120.013017), 2020-10-08
Supplement: supp_RA120.013017_158797_3_supp_606053_qhkm28.pdf [file supp_RA120.013017_158797_3_supp_606053_qhkm28.pdf]

**A novel stress-inducible CmtR-ESX3-Zn<sup>2+</sup> regulatory pathway essential for survival of *Mycobacterium bovis* under oxidative stress**

**Xiaohui Li<sup>1</sup>, Liu Chen<sup>1</sup>, Jingjing Liao<sup>1</sup>, Jiechen Hui<sup>1</sup>, Weihui Li<sup>2</sup>, Zheng-Guo He<sup>\*,1,2</sup>**

<sup>1</sup>College of Life Science and Technology, Huazhong Agricultural University, Wuhan 430070, China

<sup>2</sup>State Key Laboratory for Conservation and Utilization of Subtropical Agro-bioresources, College of Life Science and Technology, Guangxi University, Nanning 530004, China.

\*To whom correspondence should be addressed: College of Life Science and Technology, Guangxi University, Nanning 530004, China.

Email: [hezhennguo2019@163.com](mailto:hezhennguo2019@163.com)

Tel: +86-771-3225146, Fax: +86-771-3225146

**Running title:** A novel CmtR-triggered antioxidant pathway in mycobacteria

**Keywords:** *Mycobacterium bovis*; oxidative stress; ESX-3; zinc ion; CmtR

## Supplemental Information

**Figure S1.** Physical map of the *cmtR* gene region and amino acid sequence alignment of CmtR in *M. tuberculosis* H37Rv.

**Figure S2.** Assays for evaluating the DNA-binding ability of CmtR and the effect of H<sub>2</sub>O<sub>2</sub> on the intracellular DNA-binding activity of EthR in *M. bovis* BCG.

**Figure S3.** Assays for studying the effects of H<sub>2</sub>O<sub>2</sub> on the DNA-binding ability of CmtR and its mutant variants.

**Figure S4.** Assays for studying the effect of CmtR (C24S) on the growth of *M. bovis* BCG under H<sub>2</sub>O<sub>2</sub> stress.

**Figure S5.** The functional categories of the potential target genes of CmtR in *M. tuberculosis* H37Ra.

**Figure S6.** Assays for studying the effects of H<sub>2</sub>O<sub>2</sub> on the expression of *esx-3* operon genes in *M. bovis* BCG strains.

**Figure S7.** Assays for studying the growth of *M. bovis* BCG strains in 7H9 medium.

**Figure S8.** Assays for studying the survival of *M. bovis* BCG strains under H<sub>2</sub>O<sub>2</sub> stress.

**Table S1.** Primers used in this study.

**Table S2.** Strains and plasmids used in this study.

**A**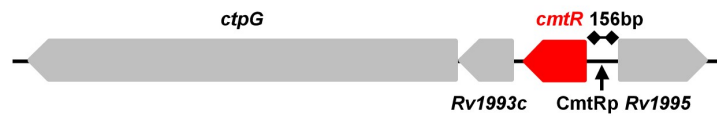**B**

|                 |                                                                                                                                              |     |
|-----------------|----------------------------------------------------------------------------------------------------------------------------------------------|-----|
| Mtu: Rv1994c    | MLT <b>CE</b> -----MRESALARLGRALADP <b>TR</b> CRILVALLDGV <b>CYP</b> GGQ <b>LA</b> AHLGLTR                                                   | 48  |
| Mra: MRA_2010   | MLT <b>CE</b> -----MRESALARLGRALADP <b>TR</b> CRILVALLDGV <b>CYP</b> GGQ <b>LA</b> AHLGLTR                                                   | 48  |
| Mbb: BCG_2011c  | MLT <b>CE</b> -----MRESALARLGRALADP <b>TR</b> CRILVALLDGV <b>CYP</b> GGQ <b>LA</b> AHLGLTR                                                   | 48  |
| Msm: MSMEG_5603 | -MQTA-----LHTDALARFGHALSDVTRTRILLSLNESPNYPADLAEQLGVSR                                                                                        | 47  |
| Mmi: MMAR_2139  | -MPMKIADDAPPTASPREDLAGAVALFHSLSDPTRLAIARRRLADGERRVVDLTRELGLPQ                                                                                | 59  |
|                 |                                                                                                                                              |     |
| Mtu: Rv1994c    | SNVSNHLS <b>CL</b> RG <b>CG</b> LVVATYEGRQVR <b>Y</b> ALADSHLARALGELVQVVLA---VDTDQ <b>PC</b> VAE                                             | 105 |
| Mra: MRA_2010   | SNVSNHLS <b>CL</b> RG <b>CG</b> LVVATYEGRQVR <b>Y</b> ALADSHLARALGELVQVVLA---VDTDQ <b>PC</b> VAE                                             | 105 |
| Mbb: BCG_2011c  | SNVSNHLS <b>CL</b> RG <b>CG</b> LVVATYEGRQVR <b>Y</b> ALADSHLARALGELVQVVLA---VDTDQ <b>PC</b> VAE                                             | 105 |
| Msm: MSMEG_5603 | QTLSNH <b>LA</b> <b>CL</b> RG <b>CG</b> LVVAVPEGR <b>R</b> TRYELADARIGRALDDL <b>M</b> GLVLD---VDPE <b>CR</b> CVGP                            | 104 |
| Mmi: MMAR_2139  | STVSS <b>HLA</b> <b>CL</b> R <b>D</b> CG <b>LI</b> AGRPEGRQ <b>V</b> FYALAVPDL <b>LD</b> LFAAA <b>ET</b> VLAATGN <b>AV</b> T <b>LC</b> PNYGT | 119 |
|                 |                                                                                                                                              |     |
| Mtu: Rv1994c    | RAASGEAV <b>EM</b> TGS-----                                                                                                                  | 118 |
| Mra: MRA_2010   | RAASGEAV <b>EM</b> TGS-----                                                                                                                  | 118 |
| Mbb: BCG_2011c  | RAASGEAV <b>EM</b> TGS-----                                                                                                                  | 118 |
| Msm: MSMEG_5603 | DGAVCG <b>CG</b> -----                                                                                                                       | 112 |
| Mmi: MMAR_2139  | RPTRASASRRRG <b>V</b> KRAAPGVAD <b>W</b> SPGR                                                                                                | 146 |

**Figure S1. Physical map of the *cmtR* gene region and amino acid sequence alignment of CmtR in *M. tuberculosis* H37Rv. (A)** The *cmtR*(*Rv1994c*) operon genes in the *M. tuberculosis* H37Rv genome are shown. The CmtR-regulated region (*cmtRp*) are indicated by black arrows. **(B)** Amino acid sequence alignment (generated using ClustalW) of CmtR for the analysis of cysteine residue conservation among different mycobacterial species. The sequences shown are Rv1994c from *M. tuberculosis* H37Rv (Mtu), MRA\_2010 from *M. tuberculosis* H37Ra (Mra), BCG\_2011c from *M. bovis* BCG (Mbb), MSMEG\_5603 from *Mycobacterium smegmatis* (Msm), and MMAR\_2139 from *Mycobacterium marinum* (Mmi). The terms marked in red represent different cysteine residue sites in the sequence.

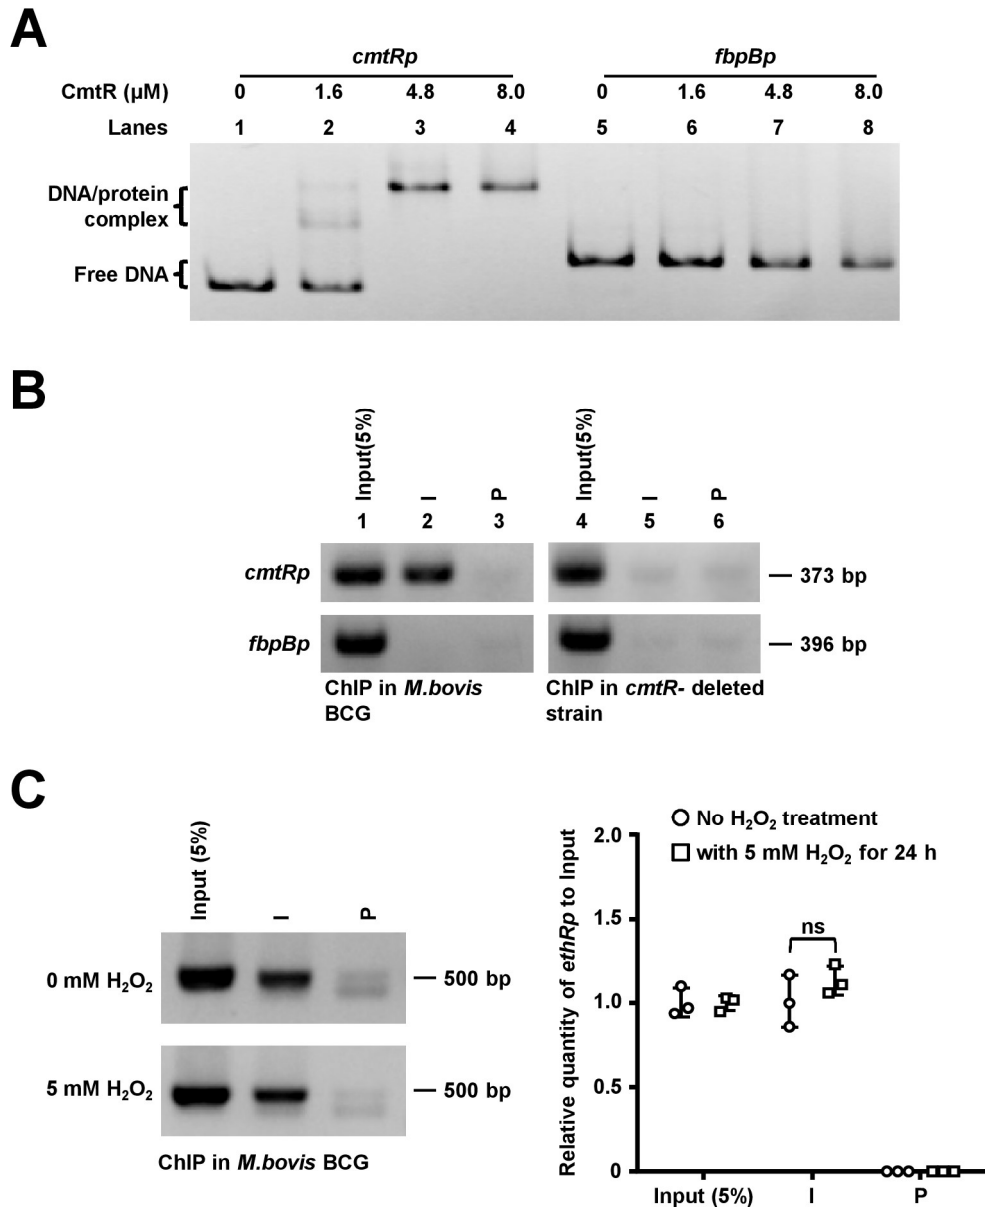

**Figure S2. Assays for evaluating the DNA-binding ability of CmtR and the effect of H<sub>2</sub>O<sub>2</sub> on the intracellular DNA-binding activity of EthR in *M. bovis* BCG. (A) EMSA. Either *cmtRp* promoter DNA (lanes 1-4) or *fbpBp* (lanes 5-8) were co-incubated with increasing quantities of CmtR, and the DNA-binding activities of the regulator were determined. (B) ChIP assays. ChIP using preimmune (P) or immune sera (I) against *cmtRp*. The mycobacterial promoter *fbpBp* was used as a negative control. The experiments were performed either in *M. bovis* BCG or in the *cmtR*-deleted strains. (C) Quantitative ChIP assays for evaluating the effect of H<sub>2</sub>O<sub>2</sub> on the intracellular DNA-binding activity of EthR in *M. bovis* BCG. The Input (5%) indicates that the supernatant of the culture containing disrupted cells was diluted to 5% and used as the template for PCR. ChIP using P or I sera against EthR. Quantification was performed using qPCR (the right panel). Error bars represent the SD from three independent experiments. The *P*-values of the data were calculated by two-tailed Student's *t*-test using GraphPad Prism 7. Asterisks represent significant**

difference (ns, not significant, two-tailed Student's *t*-test) between two groups.

**A**

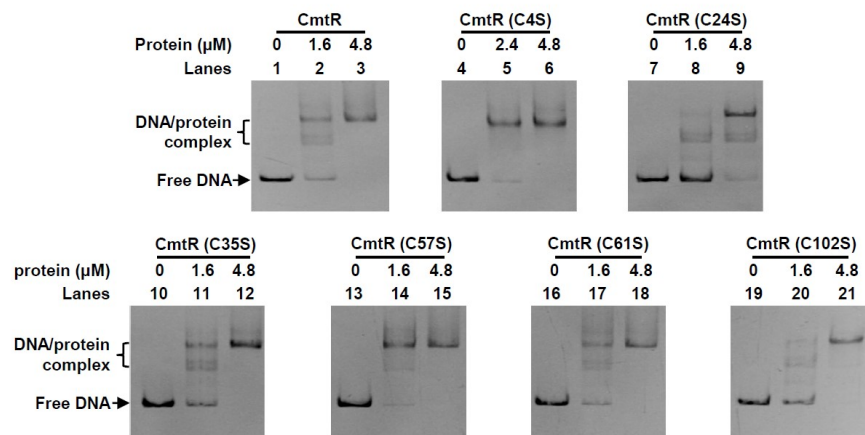

**B**

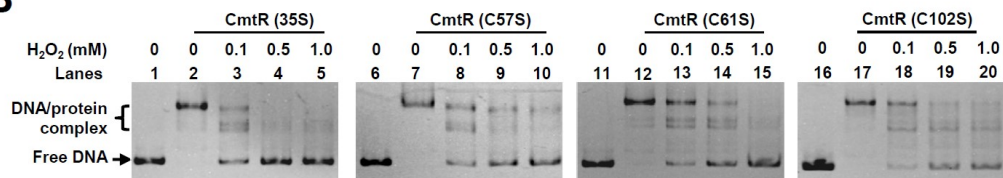

**Figure S3. Assays for studying the effects of H<sub>2</sub>O<sub>2</sub> on the DNA-binding ability of CmtR and its mutant variants.** (A) EMSA for studying the DNA-binding ability of CmtR and its mutant variants. CmtR and its mutant variants were co-incubated with the *cmtRp* DNA substrate; increasing concentrations (1.6-4.8 μM) of the proteins are indicated at the top of the panels. (B) EMSA for studying the effects of H<sub>2</sub>O<sub>2</sub> on the DNA-binding activity of CmtR mutant proteins. The protein concentration was 3.2 μM. The concentration (0.1-1 mM) of H<sub>2</sub>O<sub>2</sub> is indicated at the top of the panels. The protein/DNA complexes are indicated by arrows on the left side of the panels.

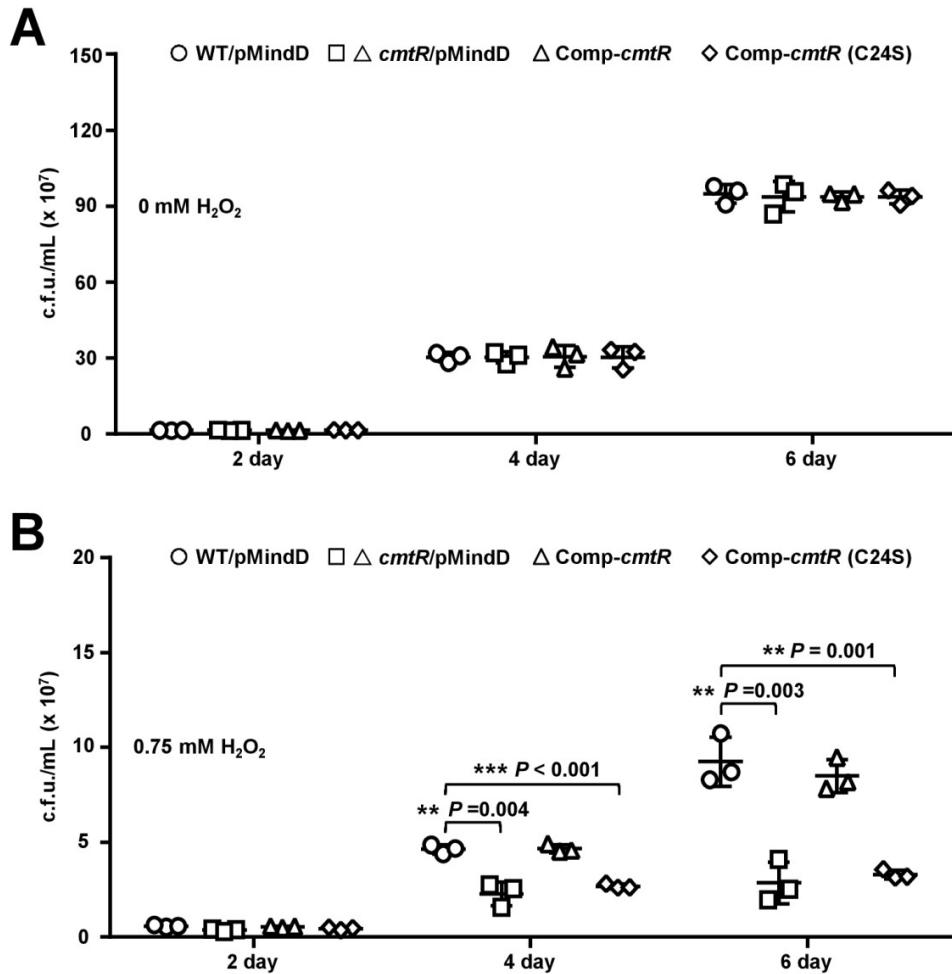

**Figure S4. Assays for studying the effect of CmtR (C24S) on the growth of *M. bovis* BCG under H<sub>2</sub>O<sub>2</sub> stress.** Different mycobacterial strains were cultured in 7H9 medium (A) and the medium supplemented with 0.75 mM H<sub>2</sub>O<sub>2</sub> (B). WT/pMindD represents the BCG/pMindD strain;  $\Delta$  *cmtR*/pMindD represents the BCG *cmtR*::*hyg*/pMindD strain; Comp-*cmtR* represents the BCG *cmtR*::*hyg*/pMindD-*cmtR* strain; Comp-*cmtR* (C24S) represents the BCG *cmtR*::*hyg*/pMindD-*cmtR* (C24S) strain. Error bars represent the SD from three independent experiments. The *P*-values of the data were calculated by unpaired two-tailed Student's *t*-test using GraphPad Prism 7. Asterisks represent significant difference (\*\*, *P*<0.01; \*\*\*, *P*<0.001, two-tailed Student's *t*-test) between two groups.

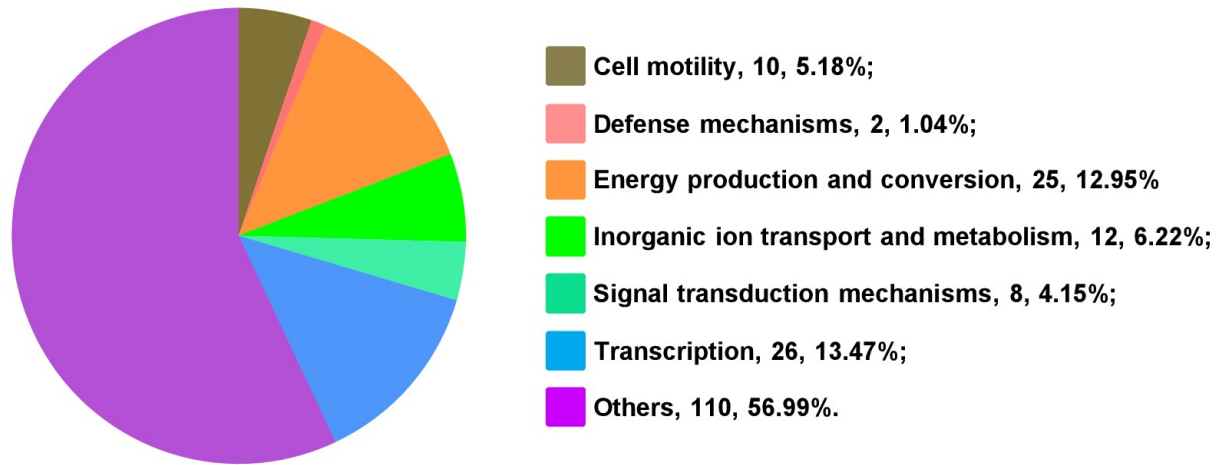

**Figure S5. The functional categories of the potential target genes of CmtR in *M. tuberculosis* H37Ra.** A functional classification of differentially expressed genes between wild-type and *cmtR*-deleted *M. tuberculosis* H37Ra strains in the context of Cluster of Orthologous Groups categories.

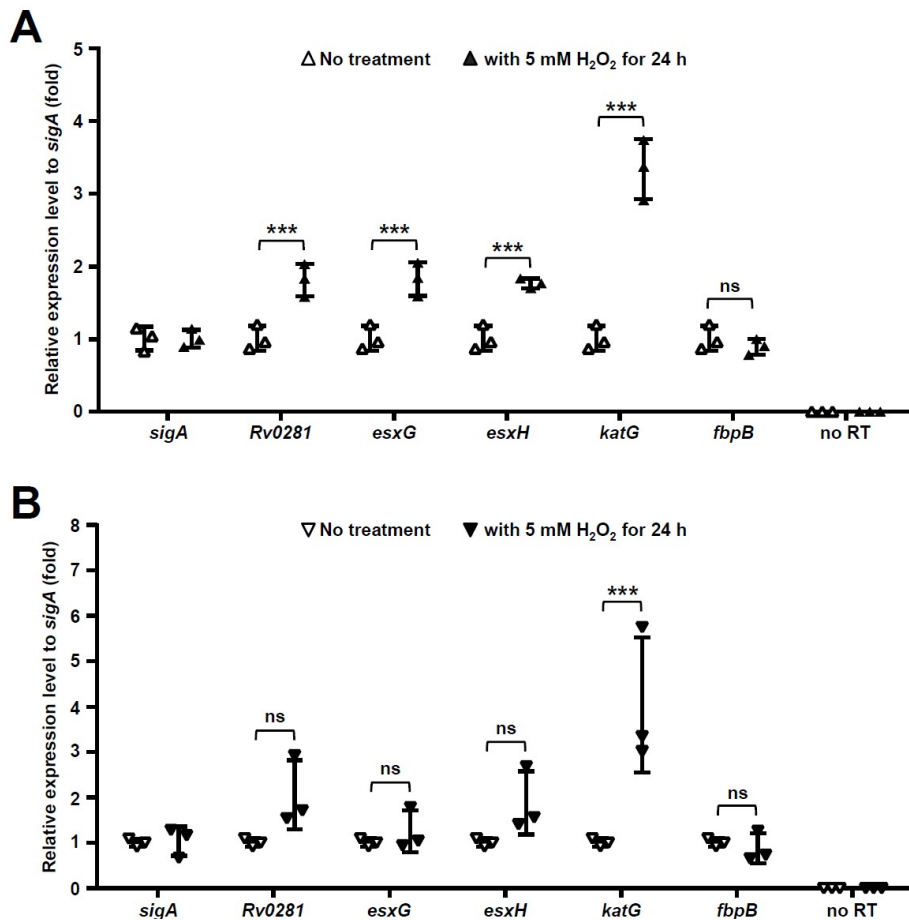

**Figure S6. Assays for studying the effects of H<sub>2</sub>O<sub>2</sub> on the expression of *esx-3* operon genes in *M. bovis* BCG strains. (A and B) qRT-PCR assays for studying the expression patterns of different genes (*Rv0281*, *esxG*, *esxH*, and *cmtR*) in *M. bovis* BCG WT (A) or *cmtR*-deleted strains (B) under treatment with indicated concentrations (0/5 mM) of H<sub>2</sub>O<sub>2</sub> for 24 h. *KatG* and *fbpB* were used as control genes. Relative expression levels of the genes were normalized to those of *sigA*, which was used as an invariant transcript control using the  $2^{-\Delta\Delta C_t}$  method. Error bars represent the SD from three independent experiments. The *P*-values of the data were calculated by unpaired two-tailed Student's *t*-test using GraphPad Prism 7. Asterisks represent significant difference (\*\*\*,  $P < 0.001$ ; ns, not significant, two-tailed Student's *t*-test) between two groups.**



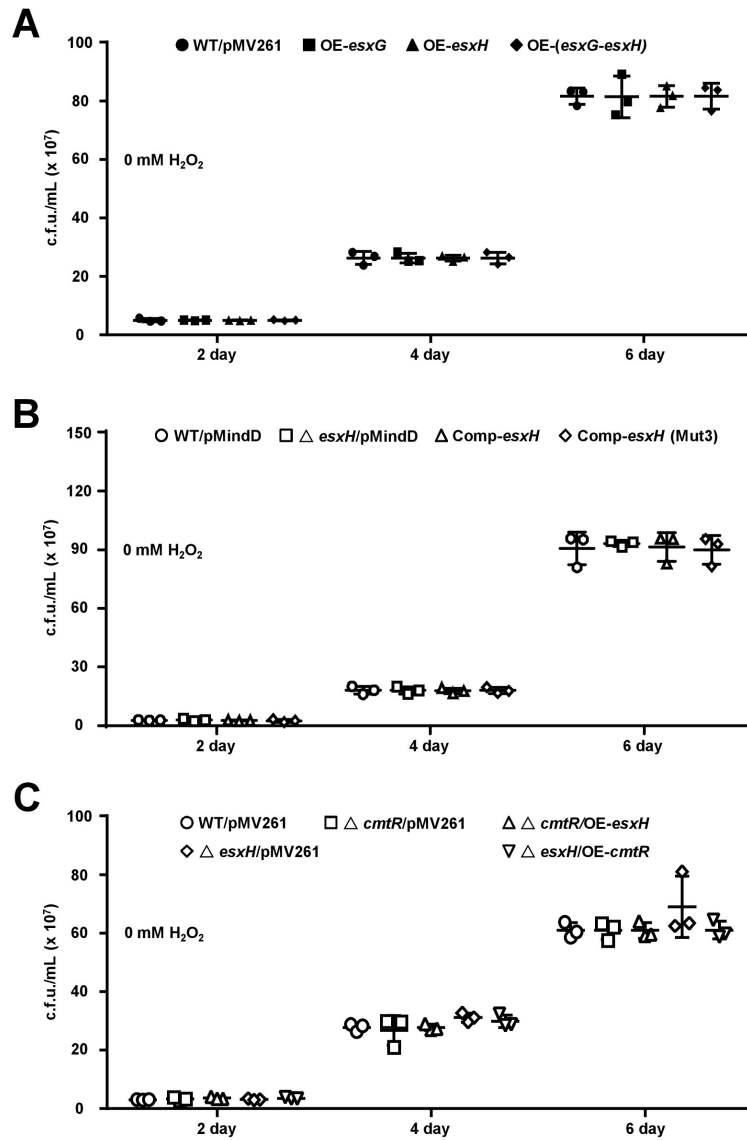

**Figure S7. Assays for studying the growth of *M. bovis* BCG strains in 7H9 medium.** (A-C) The recombinant mycobacterial strains were cultured in 7H9 medium for 6 days, and the bacterial counts were determined every 2 days. (A) WT/pMV261 represents the BCG/pMV261 strain; OE-*esxG*, OE-*esxH*, and OE-(*esxG-esxH*) represent the BCG/pMV261-*esxG*, BCG/pMV261-*esxH*, and BCG/pMV261-(*esxG-esxH*) strains, respectively; (B) WT/pMindD represents the BCG/pMindD strain; Δ *esxH*/pMindD represents the BCG *esxH*::*hyg*/pMindD strain; Comp-*esxH* represents the BCG *esxH*::*hyg*/pMindD-*esxH* strain; Comp-*esxH*-Mut3 represents the BCG *esxH*::*hyg*/pMindD-*esxH* (Mut3) (Mut3: H14A, H70A, H76A) strain. (C) WT/pMV261 represents the BCG/pMV261 strain; Δ *cmtR*/pMV261 represents the BCG *cmtR*::*hyg*/pMV261 strain; Δ *cmtR*/OE-*esxH* represents the BCG *cmtR*::*hyg*/pMV261-*esxH* strain; Δ *esxH*/pMV261 represents the BCG *esxH*::*hyg*/pMV261 strain; Δ *esxH*/OE-*cmtR* represents the BCG *esxH*::*hyg*/pMV261-*cmtR* strain.

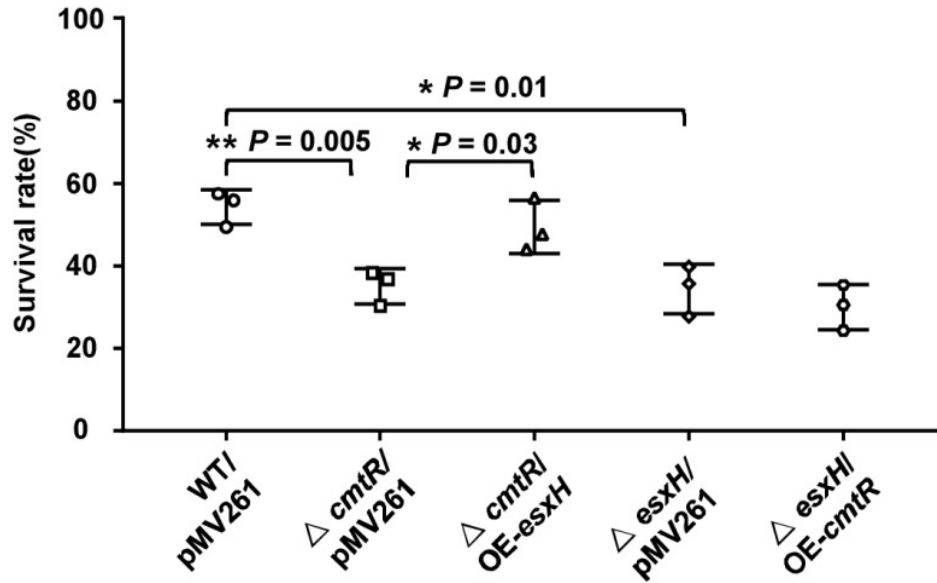

**Figure S8. Assays for studying the survival of *M. bovis* BCG strains under H<sub>2</sub>O<sub>2</sub> stress.** The recombinant strains mentioned in the legend for Figure S7 C were cultured in Sauton's medium supplemented with 3 mM H<sub>2</sub>O<sub>2</sub> for 24 h till an OD<sub>600</sub> value of 0.5 was achieved, and the bacterial counts were determined. The survival rates were calculated in terms of CFU (with H<sub>2</sub>O<sub>2</sub>)/CFU (without H<sub>2</sub>O<sub>2</sub>) for each strain. Error bars represent the SD from three independent experiments. The *P*-values of the data were calculated by unpaired two-tailed Student's *t*-test using GraphPad Prism 7. Asterisks represent significant difference (\*, *P*<0.05; \*\*\*, *P*<0.001, two-tailed Student's *t*-test) between two groups.

**Table S1. Primers used in this study**

| Usage                                         | Construct | Primer name         | Sequence (from 5' to 3')                       |
|-----------------------------------------------|-----------|---------------------|------------------------------------------------|
| Cloning and expression<br>(pMV261 or pET-28a) | CmtR      | Rv1994cf            | CCACG <u>GAATTC</u> GTATGCTGACGTGTGAGATGCG     |
|                                               |           | Rv1994cr            | CCGAT <u>CTAGAT</u> TCTCAGCTACCTGTCATCTCGA     |
| Cloning and expression                        | IdeR      | Rv2711f             | CCTG <u>GAATTC</u> CCATGAACGAGTTGGTTGATAC      |
|                                               |           | Rv2711r             | TCGTG <u>CTAGAT</u> TCAGACTTTCTCGACCTTGA       |
| Cloning and expression<br>(pET-28a-Sumo)      | CmtR      | Rv1994cf            | TTTGAT <u>GGATCC</u> ATGCTGACCTGCGAGATGCG      |
|                                               |           | Rv1994cr            | GGGGGAA <u>AAAGCTTTT</u> TAGCTGCCGGTCATTTCAACC |
| Cloning and expression<br>(pET-28a-Sumo)      | Zur       | Rv2359f             | AAAAAT <u>GGATCC</u> ATGAGTGCAGCCGGTGTG        |
|                                               |           | Rv2359r             | CCAA <u>AAAGCTTTT</u> TAGCTCCGGCAGTCTGA        |
| Cloning and expression<br>(pET-28a-Sumo)      | MabR      | Rv2242f             | ATTAG <u>GGATCC</u> GTGAACGACAATCAGTTGGC       |
|                                               |           | Rv2242r             | ATTA <u>AAAGCTTTT</u> CAGTGC GGCGTCGGATAGT     |
| Cloning and expression                        | EsxG      | Rv0287f             | CTCC <u>GAATTC</u> GGATGAGCCTTTTGGATGCTCA      |
|                                               |           | Rv0287r             | TACCT <u>CTAGAG</u> GTTAGAACCCGGTATAGGTCG      |
| Cloning and expression                        | EsxH      | Rv0288f             | CCCTCC <u>GAATTC</u> GGATGTCGCAAATCATGTAC      |
|                                               |           | Rv0288r             | TAAC <u>CTAGAG</u> GTTAGCCGCCCATTTGGC          |
| site-directed mutagenesis<br>(C4S)            | CmtR      | C4Sf                | TTAT <u>GGATCC</u> ATGCTGACGTCTGAGATGCG        |
|                                               |           | C4Sr                | CGCATCTCAGACGTCAGCAT                           |
| site-directed mutagenesis<br>(C24S)           | CmtR      | C24Sf               | CCGACGCGGTCCCGGATTCTG                          |
|                                               |           | C24Sr               | CAGAATCCGGGACCGCGTCGG                          |
| site-directed mutagenesis<br>(C35S)           | CmtR      | C35Sf               | GATGGCGTTTCTATCCCGGCCAG                        |
|                                               |           | C35Sr               | CTGGCCGGGATAGGAAACGCCATC                       |
| site-directed mutagenesis<br>(C57S)           | CmtR      | C57Sf               | CATCTGTCGTCTTTGCGGGGCTG                        |
|                                               |           | C57Sr               | CAGCCCCGCAAAGACGACAGATG                        |
| site-directed mutagenesis<br>(C61S)           | CmtR      | C61Sf               | GTTTGC GGGGCTCCGGGCTGGTAG                      |
|                                               |           | C61Sr               | CTACCAGCCCGGAGCCCCGCAAAC                       |
| site-directed mutagenesis<br>(C102S)          | CmtR      | C102Sf              | CGACCAACCCTCTGTCGCCGAG                         |
|                                               |           | C102Sr              | CTCGGCGACAGAGGGTTGGTGC                         |
| site-directed mutagenesis<br>(H14A)           | EsxH      | <i>EsxH</i> (H14A)f | ATGTTGGGTGCCCGGGGATAT                          |
|                                               |           | <i>EsxH</i> (H14A)r | ATATCCCCGGCGGCACCCAACAT                        |
| site-directed mutagenesis<br>(H70A)           | EsxH      | <i>EsxH</i> (H70A)f | TGCGGGCTATGCTGCGATGTCCA                        |
|                                               |           | <i>EsxH</i> (H70A)r | TGGACATCGCAGCATAGCCCCGA                        |
| site-directed mutagenesis<br>(H76A)           | EsxH      | <i>EsxH</i> (H76A)f | GTCCAGCACCGCTGAAGCCAACAC                       |
|                                               |           | <i>EsxH</i> (H76A)r | GTGTTGGCTTCAGCGGTGCTGGAC                       |
| EMSA                                          | Rv0280p   | Rv0280pf            | ACTGGCTAAATCCGTTGCCG                           |
|                                               |           | Rv0280pr            | AGCCGTAAACACCACAGAGG                           |
| EMSA                                          | Rv0282p   | Rv0282pf            | CTACGCTGTTGAACGACTAC                           |
|                                               |           | Rv0282pr            | CATGCCAATGTCATCAC                              |
| ChIP/EMSA                                     | fbpBp     | Rv1886cpf           | CATCGCACGCCACAAAC                              |
|                                               |           | Rv1886cpr           | GTGCCGATCATCAATCG                              |
| ChIP/EMSA                                     | cmtRp     | Rv1994cpf           | GGGACTTCCTGTTCCGG                              |

|                          |         |              |                                      |
|--------------------------|---------|--------------|--------------------------------------|
|                          |         | Rv1994cpr    | GATTCCCGCATCTCACAC                   |
| Clone to pMV261-lacZ     | Rv0280p | Rv0280pLf    | GACGGAATTCACTGGCTAAATCCGTTGCCG       |
|                          |         | Rv0280pLr    | GACGTCTAGAGCCGTAAACACCACAGAGG        |
| Clone to pMV261-lacZ     | Rv0282p | Rv0282pLf    | GAGGGAATTCCTACGCTGTTGAACGACTAC       |
|                          |         | Rv0282pLr    | GGGTGTCTAGACATGCCAATGTCATCAC         |
| Clone to pMV261-lacZ     | fbpBp   | Rv1886cpLf   | GATGGAATTCATCGCACGCCACAAAC           |
|                          |         | Rv1886cpLr   | GCACTCTAGAGTGCCGATCATCAATCG          |
| Clone to pMV261-lacZ     | cmtRp   | Rv1994cpLf   | TTTCGAATTCGGGACTTCCTGTTCCGG          |
|                          |         | Rv1994cpLr   | GGTCTCTAGAGATTCCCGCATCTCACAC         |
| Clone to pMV261-lacZ     | LacZ    | lacZf        | TTCAGCTTATGAGGATGAGGGAAGCAAG         |
|                          |         | lacZr        | ATGCGCTAGCTTATTTTGACACCAGACCA        |
| knock out of <i>cmtR</i> | CmtR    | BCG_2011cUPf | TCACACTTAATTAAGTGTACTACCGACGTTAGCCAG |
|                          |         | BCG_2011cUPr | GGCGACTAGTAGATCAAATAGTACACC          |
| knock out of <i>cmtR</i> | CmtR    | BCG_2011cDNf | CCCGAAGCTTGCAGCAGACGACACGACTTGTG     |
|                          |         | BCG_2011cDNr | AAACGCTAGCGCGATGGTCATCAGGGTGC        |
| knock out of <i>esxH</i> | EsxH    | BCG_0328UPf  | CCCGACTTAATTAAGTCGCGGTGGTATCAAGG     |
|                          |         | BCG_0328UPr  | GGTGACTAGTCATCACAAATCCTCTCG          |
| knock out of <i>esxH</i> | EsxH    | BCG_0328DNf  | TTAGAAGCTTCTAGCTCGCGCTACATGG         |
|                          |         | BCG_0328DNr  | TTATTTTCGCTAGCGCAAACGGTGTCCCAGG      |
| qRT-PCR                  | SigA    | RT-sigAf     | TCGCGCCTACCTCAAACAG                  |
|                          |         | RT-sigAr     | CGTACAGGCCAGCCTCGAT                  |
| qRT-PCR                  | CmtR    | RT-CmtRf     | TGCTGGATGGCGTTTGT                    |
|                          |         | RT-CmtRr     | GGCCCTCATAGGTTGCGACTA                |
| qRT-PCR                  | FbpB    | RT-fbpBf     | CGCGACATCAAGGTTTCAGTT                |
|                          |         | RT-fbpBr     | CCGGCATGACTATCGACAGT                 |
| qRT-PCR                  | Rv0281  | RT-Rv0281f   | GGGCTGCTGATCTATCTCCC                 |
|                          |         | RT-Rv0281r   | TCGCTCGTTGTAGACCAGTT                 |
| qRT-PCR                  | EsxG    | RT-esxGf     | CGGCTCAGGCGTTTCAC                    |
|                          |         | RT-esxGr     | CCGCCGCCACAAACC                      |
| qRT-PCR                  | EsxH    | RT-esxHf     | CAGGCCGCGTTGCA                       |
|                          |         | RT-esxHr     | CTGCCACGCTGATACGT                    |
| qRT-PCR                  | KatG    | RT-katGf     | CCGAGATTGCCAGCCTTAA                  |
|                          |         | RT-katGr     | GTTGACCTCCCACCCGACT                  |

Notes: Restriction enzyme sites are underlined.

**Table S2. Strains and plasmids used in this study**

| Plasmid or Strain           | Relevant genotype or feature                                           | Source or reference |
|-----------------------------|------------------------------------------------------------------------|---------------------|
| Plasmid                     |                                                                        |                     |
| pET28a                      | Kan <sup>r</sup> , lacZ operon, T7 promotor, His-Tag                   | Novagen             |
| pET28a- <i>cmtR</i>         | <i>cmtR</i> inserted in <i>EcoRI-XbaI</i> of pET28a                    | This study          |
| pET28a- <i>cmtR</i> (C4S)   | <i>cmtR</i> (C4S) inserted in <i>EcoRI-XbaI</i> of pET28a              | This study          |
| pET28a- <i>cmtR</i> (C24S)  | <i>cmtR</i> (C24S) inserted in <i>EcoRI-XbaI</i> of pET28a             | This study          |
| pET28a- <i>cmtR</i> (C35S)  | <i>cmtR</i> (C35S) inserted in <i>EcoRI-XbaI</i> of pET28a             | This study          |
| pET28a- <i>cmtR</i> (C57S)  | <i>cmtR</i> (C57S) inserted in <i>EcoRI-XbaI</i> of pET28a             | This study          |
| pET28a- <i>cmtR</i> (C61S)  | <i>cmtR</i> (C61S) inserted in <i>EcoRI-XbaI</i> of pET28a             | This study          |
| pET28a- <i>cmtR</i> (C102S) | <i>cmtR</i> (C102S) inserted in <i>EcoRI-XbaI</i> of pET28a            | This study          |
| pET28a- <i>ideR</i>         | <i>ideR</i> inserted in <i>EcoRI-XbaI</i> of pET28a                    | This study          |
| pET28a-Sumo                 | Kan <sup>r</sup> , lacZ operon, T7 promotor, His-Tag                   | Novagen             |
| pET28a-Sumo- <i>cmtR</i>    | <i>cmtR</i> inserted in <i>BamHI-HindIII</i> of pET28a-Sumo            | This study          |
| pET28a-Sumo- <i>mabR</i>    | <i>mabR</i> inserted in <i>BamHI-HindIII</i> of pET28a-Sumo            | This study          |
| pET28a-Sumo- <i>zur</i>     | <i>zur</i> inserted in <i>BamHI-HindIII</i> of pET28a-Sumo             | This study          |
| pMV261                      | Kan <sup>r</sup> , pAL5000 replicon                                    | This study          |
| pMV261- <i>cmtR</i>         | <i>cmtR</i> inserted in <i>EcoRI-XbaI</i> of pMV261                    | This study          |
| pMV261- <i>esxG</i>         | <i>esxG</i> inserted in <i>EcoRI-XbaI</i> of pMV261                    | This study          |
| pMV261- <i>esxH</i>         | <i>esxH</i> inserted in <i>EcoRI-XbaI</i> of pMV261                    | This study          |
| pMV261- <i>esxG-esxH</i>    | <i>esxG-esxH</i> inserted in <i>EcoRI-XbaI</i> of pMV261               | This study          |
| pMV261- <i>lacZ</i>         | <i>lacZ</i> fused with null-promoter                                   |                     |
| pMV261-hsp60- <i>lacZ</i>   | hsp60 promoter fused with <i>lacZ</i>                                  | This study          |
| pMV261-Rv0280p- <i>lacZ</i> | Rv0280p promoter fused with <i>lacZ</i>                                | This study          |
| pMV261-Rv0282p- <i>lacZ</i> | Rv0282p promoter fused with <i>lacZ</i>                                | This study          |
| pMV261-fbpBp- <i>lacZ</i>   | fbpBp promoter fused with <i>lacZ</i>                                  | This study          |
| pMV261-cmtRp- <i>lacZ</i>   | cmtRp promoter fused with <i>lacZ</i>                                  | This study          |
| pMindD                      | Kan <sup>r</sup> , tet <sup>r</sup> , pAL5000 replicon                 |                     |
| pMindD- <i>cmtR</i>         | <i>cmtR</i> inserted in <i>EcoRI-XbaI</i> of pMindD                    | This study          |
| pMindD- <i>cmtR</i> (C24S)  | <i>cmtR</i> (C24S) inserted in <i>EcoRI-XbaI</i> of pMindD             | This study          |
| pMindD- <i>esxH</i>         | <i>esxH</i> inserted in <i>EcoRI-XbaI</i> of pMindD                    | This study          |
| pMindD- <i>esxH</i> (Mut3)  | <i>esxH</i> (H14A, H70A, H76A) inserted in <i>EcoRI-XbaI</i> of pMindD | This study          |
| Strain                      |                                                                        |                     |
| <i>E. coli</i>              |                                                                        |                     |
| DH5a                        | Host for plasmid construction                                          | TaKaRa              |
| BL21(λDE3)                  | Host for protein expression                                            | TaKaRa              |
| <i>M. bovis</i> BCG         |                                                                        |                     |
| BCG/WT                      | <i>M. bovis</i> BCG wild-type                                          | ATCC                |
| BCG/ <i>cmtR::hyg</i>       | BCG with <i>cmtR</i> replaced by <i>hyg</i>                            | This study          |
| BCG/ <i>esxH::hyg</i>       | BCG with <i>esxH</i> replaced by <i>hyg</i>                            | This study          |
| BCG/pMV261                  | BCG with pMV261                                                        | This study          |

|                                                 |                                                                                                                                                           |            |
|-------------------------------------------------|-----------------------------------------------------------------------------------------------------------------------------------------------------------|------------|
| BCG <i>cmtR</i> ::hyg/pMV261                    | <i>cmtR</i> replaced by <i>hyg</i> in BCG, <i>cmtR</i> -deleted strain with pMV261                                                                        | This study |
| BCG <i>cmtR</i> ::hyg/pMV261- <i>esxH</i>       | <i>cmtR</i> replaced by <i>hyg</i> in BCG, <i>cmtR</i> -deleted strain with pMV261- <i>esxH</i>                                                           | This study |
| BCG <i>esxH</i> ::hyg/pMV261                    | <i>esxH</i> replaced by <i>hyg</i> in BCG, <i>esxH</i> -deleted strain with pMV261                                                                        | This study |
| BCG <i>esxH</i> ::hyg/pMV261- <i>cmtR</i>       | <i>esxH</i> replaced by <i>hyg</i> in BCG, <i>esxH</i> -deleted strain with pMV261- <i>cmtR</i>                                                           | This study |
| BCG/pMV261- <i>cmtR</i>                         | <i>cmtR</i> -overexpression Strain                                                                                                                        | This study |
| BCG/pMV261- <i>esxG</i>                         | <i>esxG</i> -overexpression Strain                                                                                                                        | This study |
| BCG/pMV261- <i>esxH</i>                         | <i>esxH</i> -overexpression Strain                                                                                                                        | This study |
| BCG/pMV261- <i>esxG</i> - <i>esxH</i>           | <i>esxG</i> - <i>esxH</i> -overexpression Strain                                                                                                          | This study |
| BCG/pMinD                                       | BCG with pMinD                                                                                                                                            | This study |
| BCG <i>cmtR</i> ::hyg/pMinD                     | <i>cmtR</i> replaced by <i>hyg</i> in BCG, <i>cmtR</i> -deleted strain with pMinD                                                                         | This study |
| BCG <i>cmtR</i> ::hyg/pMinD- <i>cmtR</i>        | <i>cmtR</i> replaced by <i>hyg</i> in BCG, <i>cmtR</i> -deleted strain with pMinD- <i>cmtR</i>                                                            | This study |
| BCG <i>cmtR</i> ::hyg/pMinD- <i>cmtR</i> (C24S) | <i>cmtR</i> replaced by <i>hyg</i> in BCG, <i>cmtR</i> -deleted strain with pMinD- <i>cmtR</i> (C24S)                                                     | This study |
| BCG <i>esxH</i> ::hyg/pMinD                     | <i>esxH</i> replaced by <i>hyg</i> in BCG, <i>esxH</i> -deleted strain with pMinD                                                                         | This study |
| BCG <i>esxH</i> ::hyg/pMinD- <i>esxH</i>        | <i>esxH</i> replaced by <i>hyg</i> in BCG, <i>esxH</i> -deleted strain with pMinD- <i>esxH</i>                                                            | This study |
| BCG <i>esxH</i> ::hyg/pMinD- <i>esxH</i> (Mut3) | <i>esxH</i> replaced by <i>hyg</i> in BCG, <i>esxH</i> -deleted strain with pMinD- <i>esxH</i> (H14A, H70A, H76A)                                         | This study |
| BCG/pMVL1                                       | BCG with pMV261- <i>lacZ</i> , negative control of $\beta$ -galactosidase assays                                                                          | This study |
| BCG/pMVL2                                       | BCG with pMV261- <i>hsp60-lacZ</i> , positive control of $\beta$ -galactosidase assays                                                                    | This study |
| BCG/pMVL3                                       | BCG with pMV261-Rv0280p- <i>lacZ</i>                                                                                                                      | This study |
| BCG/pMVL4                                       | BCG with pMV261-Rv0282p- <i>lacZ</i>                                                                                                                      | This study |
| BCG/pMVL5                                       | BCG with pMV261- <i>fbpBp-lacZ</i>                                                                                                                        | This study |
| BCG/pMVL6                                       | BCG with pMV261- <i>cmtRp-lacZ</i>                                                                                                                        | This study |
| BCG <i>cmtR</i> ::hyg/pMVL1                     | <i>cmtR</i> replaced by <i>hyg</i> in BCG, <i>cmtR</i> -deleted strain with pMV261- <i>lacZ</i> , negative control of $\beta$ -galactosidase assays       | This study |
| BCG <i>cmtR</i> ::hyg/pMVL2                     | <i>cmtR</i> replaced by <i>hyg</i> in BCG, <i>cmtR</i> -deleted strain with pMV261- <i>hsp60-lacZ</i> , positive control of $\beta$ -galactosidase assays | This study |
| BCG <i>cmtR</i> ::hyg/pMVL3                     | <i>cmtR</i> replaced by <i>hyg</i> in BCG, <i>cmtR</i> -deleted strain with pMV261-Rv0280p- <i>lacZ</i>                                                   | This study |
| BCG <i>cmtR</i> ::hyg/pMVL4                     | <i>cmtR</i> replaced by <i>hyg</i> in BCG, <i>cmtR</i> -deleted strain with pMV261-Rv0282p- <i>lacZ</i>                                                   | This study |
| BCG <i>cmtR</i> ::hyg/pMVL5                     | <i>cmtR</i> replaced by <i>hyg</i> in BCG, <i>cmtR</i> -deleted strain with pMV261- <i>fbpBp-lacZ</i>                                                     | This study |
| BCG <i>cmtR</i> ::hyg/pMVL6                     | <i>cmtR</i> replaced by <i>hyg</i> in BCG, <i>cmtR</i> -deleted strain with pMV261- <i>cmtRp-lacZ</i>                                                     | This study |
| <i>M. tuberculosis</i> H37Ra                    |                                                                                                                                                           |            |
| H37Ra/WT                                        | Wild-type <i>M. bovis</i> H37Ra                                                                                                                           | ATCC       |
| H37Ra/ <i>cmtR</i> ::hyg                        | H37Ra with <i>cmtR</i> replaced by <i>hyg</i>                                                                                                             | This study |
